# Supplementary material
Source: PubMed Central journal article supplement (PMC5210702)
Supplement: supp_pp.16.00795_PP2015-01571DR3_Supplemental_MaterialandsMethods.pdf [file supp_pp.16.00795_PP2015-01571DR3_Supplemental_MaterialandsMethods.pdf]

---

## 1    **Material and methods**

### 2    **Plant material**

3    *Petunia* (*Petunia hybrida* ‘Mitchell’) plants were grown under greenhouse conditions  
4    (22-25°C) and a natural photoperiod (Liu et al., 2011). Flowers were emasculated 1 d before  
5    they were fully open to prevent self-pollination. Eight to ten petunia flowers were harvested  
6    at the anthesis stage (corollas 90° reflexed) and were then placed immediately in tap water.  
7    Buds were collected at about the 3rd week after the first flower opened. Stems, leaves and  
8    roots were collected from plants at the vegetative stage when the plants were ~10 cm in  
9    height. All tissues were frozen in liquid nitrogen and stored at –80°C until used for RNA  
10    extraction. Fresh weights were measured immediately before freezing (Liu et al, 2011). All  
11    experiments were conducted at least three times with independently collected and extracted  
12    tissues unless otherwise noted.

### 13    **Ethylene treatment**

14    *Petunia* flowers were treated with ethylene according to previously described protocols (Tan  
15    et al., 2014). *Petunia* flowers were harvested at anthesis, and their stems were re-cut to 5 cm,  
16    placed in flasks with distilled water, and subsequently treated with 2 µl l<sup>-1</sup> ethylene for 0, 8,  
17    16, 24, 32, 40 and 48 h. Corollas from 8–10 flowers were collected at each time point,  
18    immediately frozen in liquid nitrogen, and stored at –80°C for subsequent RNA or protein  
19    extraction.

20    Proteasome inhibitor studies were performed by spraying corollas with an 80 µm MG132  
21    solution (8% DMSO) 4 h prior to 16 h ethylene treatment. Control corollas were sprayed  
22    with an 8% DMSO solution (Kevany te al, 2007).

### 23    **RNA extraction, library construction and sequencing**

24    The total RNA of each of above listed samples was isolated using the Trizol Kit (Promega,  
25    USA) following by the manufacturer’s instructions. Then the total RNA was treated with

---

RNase-free DNase I (Takara Bio, Japan) for 30 min at 37°C to remove residual DNA. RNA quality was verified using a 2100 Bio-analyzer (Agilent Technologies, Santa Clara, CA) and were also checked by RNase free agarose gel electrophoresis. Next, Poly (A) mRNA was isolated using oligo-dT beads (Qiagen). All mRNA was broken into short fragments by adding fragmentation buffer. First-strand cDNA was generated using random hexamer-primed reverse transcription, followed by the synthesis of the second-strand cDNA using RNase H and DNA polymerase I. The cDNA fragments were purified using a QIAquick PCR extraction kit. These purified fragments were then washed with EB buffer for end repair, poly (A) addition and ligated to sequencing adapters. Following agarose gel electrophoresis and extraction of cDNA from gels, the cDNA fragments were purified and enriched by PCR to construct the final cDNA library. The cDNA library was sequenced on the Illumina sequencing platform (Illumina HiSeq™ 2000) using the paired-end technology by Gene Denovo Co. (Guangzhou, China). A Perl program was written to select clean reads by removing low quality sequences (there were more than 50% bases with quality lower than 20 in one sequence), reads with more than 5% N bases (bases unknown) and reads containing adaptor sequences.

#### **Reads alignment and Normalization of gene expression levels**

Sequencing reads were mapped to reference sequence by the SOAPaligner/soap2 (Li et al, 2009), a tool designed for short sequences alignment. Coverage of reads in one gene was used to calculate expression level of this gene. Using this method we obtained the expression levels of all genes detected.

Reads that could be uniquely mapped to a gene were used to calculate the expression level. The gene expression level was measured by the number of uniquely mapped reads per kilobase of exon region per million mappable reads (RPKM). The formula was defined as below:

$$RPKM = \frac{10^6 C}{NL/10^3}$$

---

In which C was the number of reads uniquely mapped to the given gene; N was the number of reads uniquely mapped to all genes; L was the total length of exons from the given gene. For genes with more than one alternative transcript, the longest transcript was selected to calculate the RPKM. The RPKM method eliminates the influence of different gene lengths and sequencing discrepancies on the gene expression calculation. Therefore, the RPKM value can be directly used for comparing the differences in gene expression among samples. All expression data statistic and visualization was conducted with R package (<http://www.r-project.org/>).

## **Quantitative real-time PCR assays**

Quantitative real-time PCR assays were performed according to the methods of Liu et al. (2011). Total RNA was extracted from the samples of corollas and digested with RNase-free DNAase I followed by reverse transcription (RT) according to the manufacturer's instruction. PCR analysis was performed with the cDNA extracted of different samples as a template.

The quantitative PCR was performed on a LightCycler<sup>®</sup> 480 Real-Time PCR system (Roche). Samples were subjected to thermal-cycling conditions of DNA polymerase activation at 95°C for 4 min, 40 cycles of 45 s at 95°C, 45 s at 52°C or 55°C, 45 s at 72°C, and 45 s at 80°C; a final elongation step of 7 min at 72°C was performed. The amplicon was analyzed by electrophoresis and sequenced once for identity confirmation. The sequences of all primers used for real-time PCR analysis are described in Supplemental Table S1. *Petunia ACTIN* was used as the housekeeping gene to quantify cDNA abundance. Primer specificity was determined by melting curve analysis; a single, sharp peak in the melting curve ensured that a single, specific DNA species had been amplified. Quantification was based on analysis of the threshold cycle (Ct) value as described by Pfaffl (2001).

## **Protein Extraction**

*Petunia* corollas were ground in liquid nitrogen, then the cell powder was transferred to 5 mL centrifuge tube and sonicated three times on ice using a high intensity ultrasonic processor (Scientz) in lysis buffer (8 M urea, 1% Triton-100, 65 mM DTT and 0.1% Protease Inhibitor

---

Cocktail). The remaining debris was removed by centrifugation at 20,000 g at 4 °C for 10 min. Finally, the protein was precipitated with cold 15% TCA for 2 h at -20 °C. After centrifugation at 4 °C for 10 min, the supernatant was discarded. The remaining precipitate was washed with cold acetone for three times. The protein was redissolved in buffer (8 M urea, 100 mM TEAB, pH 8.0) and the protein concentration was determined with 2-D Quant kit according to the manufacturer's instructions. Three biology replicates were performed.

### **Preparation of Specific Antibodies against proteins and western blot analysis**

The synthetic peptides of proteins were used as an antigen for antibody production in rabbit from Abmart ([www.ab-mart.com.cn/](http://www.ab-mart.com.cn/)). These antibodies were used for blotting analysis.

Western Blot Analyses were performed according to the methods of Tatsuki et al. (2001). Proteins were separated using SDS-polyacrylamide gel electrophoresis (PAGE; 10% acrylamide gels) and blotted onto nitrocellulose membranes (BA-S 85; Schleicher & Schuell). The membrane was blocked with 5% skim milk, 0.05% Tween 20 in Tris-buffered saline (50 mM Tris-HCl, pH 8.0, 150 mM NaCl). Purified ubiquitin antibody or anti-GAPDH antibody (internal reference) were used at a concentration of 50 mg/ml. The membrane was washed with 0.05% Tween 20 in Tris-buffered saline and then reacted with horseradish peroxidase-conjugated goat anti-rabbit IgG (Pierce) at a dilution of 1:20,000. Detection was achieved using Super Signal West Femto™ (Pierce). Three biological replicates were performed.

### **Trypsin Digestion**

For digestion, the protein solution was reduced with 10 mM DTT for 1 h at 37 °C and alkylated with 20 mM IAA for 45 min at room temperature in darkness. For trypsin digestion, the protein sample was diluted by adding 100 mM TEAB to urea concentration less than 2M. Finally, trypsin was added at 1:50 trypsin-to-protein mass ratio for the first digestion overnight and 1:100 trypsin-to-protein mass ratio for a second 4 h-digestion. Approximately 100 µg protein for each sample was digested with trypsin for the following experiments.

### **TMT Labeling**

---

106 After trypsin digestion, peptide was desalted by Strata X C18 SPE column (Phenomenex) and  
107 vacuum-dried. Peptide was reconstituted in 0.5 M TEAB and processed according to the  
108 manufacturer's protocol for 6-plex TMT kit. Briefly, one unit of TMT reagent (defined as the  
109 amount of reagent required to label 100 µg of protein) were thawed and reconstituted in 24 µl  
110 ACN. The peptide mixtures were then incubated for 2 h at room temperature and pooled,  
111 desalted and dried by vacuum centrifugation.

#### 112 **HPLC Fractionation**

113 The sample was then fractionated into fractions by high pH reverse-phase HPLC using  
114 Agilent 300 Extend C18 column (5 µm particles, 4.6 mm ID, 250 mm length). Briefly,  
115 peptides were first separated with a gradient of 2% to 60% acetonitrile in 10 mM ammonium  
116 bicarbonate pH 10 over 80 min into 80 fractions, Then, the peptides were combined into 18  
117 fractions and dried by vacuum centrifuging.

#### 118 **Affinity Enrichment**

119 To enrich Kub peptides, tryptic peptides dissolved in NETN buffer (100 mM NaCl, 1 mM  
120 EDTA, 50 mM Tris-HCl, 0.5% NP-40, pH 8.0) were incubated with pre-washed antibody  
121 beads (PTM Biolabs) at 4°C overnight with gentle shaking. The beads were washed four  
122 times with NETN buffer and twice with ddH<sub>2</sub>O. The bound peptides were eluted from the  
123 beads with 0.1% TFA. The eluted fractions were combined and vacuum-dried. The resulting  
124 peptides were cleaned with C18 ZipTips (Millipore) according to the manufacturer's  
125 instructions, followed by LC-MS/MS analysis.

#### 126 **LC-MS/MS Analysis**

127 Three parallel analyses for each fraction were performed. LC-MS/MS Analysis was  
128 performed according to previously described protocols(Wu et al., 2015). Peptides were  
129 dissolved in 0.1% FA, directly loaded onto a reversed-phase pre-column (Acclaim PepMap  
130 100, Thermo Scientific). Peptide separation was performed using a reversed-phase analytical  
131 column (Acclaim PepMap RSLC, Thermo Scientific). The gradient was comprised of an  
132 increase from 8% to 25% solvent B (0.1% FA in 98% ACN) over 26 min, 25% to 38% in 8

---

133 min and climbing to 85% in 4 min then holding at 85% for the last 4min, all at a constant flow  
134 rate of 280 nl/min on an EASY-nLC 1000 UPLC system. The resulting peptides were  
135 analyzed by Q Exactive<sup>TM</sup> Plus hybrid quadrupole-Orbitrap mass spectrometer (Thermo  
136 Fisher Scientific).

137 The peptides were subjected to NSI source followed by tandem mass spectrometry (MS/MS)  
138 in Q Exactive<sup>TM</sup> Plus (Thermo) coupled online to the UPLC. Intact peptides were detected in  
139 the Orbitrap at a resolution of 70,000. Peptides were selected for MS/MS using NCE setting  
140 as 30; ion fragments were detected in the Orbitrap at a resolution of 17,500. A data-dependent  
141 procedure that alternated between one MS scan followed by 20 MS/MS scans was applied for  
142 the top 20 precursor ions above a threshold ion count of 1.5E4 in the MS survey scan with  
143 30.0s dynamic exclusion. The electrospray voltage applied was 2.0 kV. Automatic gain  
144 control (AGC) was used to prevent overfilling of the ion trap; 5E4 ions were accumulated for  
145 generation of MS/MS spectra. For MS scans, the m/z scan range was 350 to 1800. Fixed first  
146 mass was set as 100 m/z.

#### 147 **Database Search**

148 The resulting MS/MS data were processed using MaxQuant with an integrated Andromeda  
149 search engine (v.1.4.1.2). Tandem mass spectra were searched against a database (40,341  
150 sequences) made from RNA sequencing of petunias in this study.

151 For proteomic peptides, Trypsin/P was used as a cleavage enzyme, allowing up to 2 missed  
152 cleavages. Mass error was set to 10 ppm for precursor ions and to 0.02 Da for fragment ions.  
153 Carbamidomethyl on Cys, TMT-6plex (N-term) and TMT-6plex (K) were specified as fixed  
154 modifications, and oxidation on Met was specified as a variable modification. FDR was  
155 adjusted to < 1%, and peptide ion score was set to > 20.

156 For Kub peptides, Trypsin/P was specified as a cleavage enzyme, allowing up to 3 missed  
157 cleavages. First, the search range was set to 5 ppm for precursor ions, and the main search  
158 range was set to 5 ppm and 0.02 Da for fragment ions. Carbamidomethyl on Cys was  
159 specified as a fixed modification, and GlyGly on lysine and oxidation on Met were specified

---

160 as variable modifications. The label-free quantification method was LFQ, and FDR was  
161 adjusted to < 1%, while the minimum score for modified peptides was set to > 40.

## 162 **Bioinformatic Analysis**

163 Bioinformatic analysis was performed according to previously described protocols (Wu et al.,  
164 2015; Xie et al., 2015). GO term association and enrichment analysis were performed using  
165 the Database for Annotation, Visualization and Integrated Discovery (DAVID). The KEGG  
166 database was used to annotate protein pathways (Kanehisa and Goto, 2000). The KEGG  
167 online service tool KAAS was used to annotate the proteins' KEGG database descriptions.  
168 The annotation results were mapped on the KEGG pathway database using the KEGG online  
169 service tool KEGG Mapper. The domain annotation was performed with InterProScan on the  
170 InterPro domain database via web-based interfaces and services. WoLF PSORT was used for  
171 predicting subcellular localization (Horton et al., 2007). The CORUM database was used to  
172 annotate protein complexes. Motif-X software was used to analyze the models of the  
173 sequences with amino acids in specific positions of ubiquityl-21-mers (ten amino acids  
174 upstream and downstream of the Kub site) in all of the protein sequences. In addition, the IPI  
175 Arabidopsis proteome was used as the background database, and the other parameters were  
176 set to the default values. The setting parameters for searching motifs using Motif-X software  
177 were 'occurrences 20' and 'the Bonferroni corrected  $P = 0.005$ '. Protein-protein interaction  
178 networks were analyzed with the IntAct database (<http://www.ebi.ac.uk/intact/>). The  
179 protein-protein interaction network map was generated with the Cytoscape software  
180 (Shannon et al., 2003).

## 181 **Protein quantitative ratio analysis**

182 Protein quantitative ratio was calculated as median of all unique peptides' ratio. Student's t  
183 test was performed to investigate differentially expressed proteins (DEPs) effects. In order to  
184 meet the condition of student's t test, logarithmic transformation was performed to  
185 achieve the ratio of all peptides. Then, Student's t test was explored to calculate the p  
186 value.

---

## 187    **Ubiquitinated Protein Secondary Structure Analysis**

188    In this study, we show the distribution of ubiquitinated and non-ubiquitinated amino acids in  
189    protein secondary structures. Probabilities for different secondary structures (alpha-helix,  
190    beta-strand and coil) of ubiquitinated lysine were compared with the secondary structure  
191    probabilities of all lysine in all identified proteins. We further investigated the local secondary  
192    structures of proteins using NetSurfP, a software that predicts the surface accessibility and  
193    secondary structure of amino acids in an amino acid sequence.

## 194    **Conservation analysis of ubiquitinated proteins**

195    To analyze the conservation of ubiquitinated proteins, first, proteins homologous to the  
196    ubiquitinated proteins identified in this study were obtained by blasting in UniprotKB database  
197    against eight species, including *Oryza sativa japonica*, *Brachypodium distachyon*, *Sorghum*  
198    *bicolor*, *Zea mays*, *Arabidopsis thaliana*, *Glycine max*, *Solanum lycopersicum*, and *Vitis vinifera*.  
199    All of the protein sequences of these 8 species were downloaded from the UniprotKB database.  
200    The sequence alignment software BLASTp was used to obtain the homologous proteins of the  
201    ubiquitinated proteins in this study. To find conserved sites, the multiple sequence alignment  
202    software muscle was used to align homologs.

203

204 **References:**

- 205 Horton P, Park K, Obayashi T, Fujita N, Harada H, Adams-Collier CJ, Nakai K (2007) WoLF  
206 PSORT: protein localization predictor. NUCLEIC ACIDS RES 35:W585-W587  
207 Kanehisa M, Goto S (2000) KEGG: kyoto encyclopedia of genes and genomes. NUCLEIC  
208 ACIDS RES 28:27-30  
209 Kevany B M, Tieman D M, Taylor M G, et al. (2007) Ethylene receptor degradation controls  
210 the timing of ripening in tomato fruit[J]. The Plant Journal, 51(3): 458-467.  
211 Li R, Yu C, Li Y, et al. SOAP2: an improved ultrafast tool for short read alignment[J].  
212 Bioinformatics, 2009, 25(15): 1966-1967.  
213 Liu J, Li J, Wang H, Fu Z, Liu J and Yu Y. (2011) Identification and expression analysis of  
214 ERF transcription factor genes in petunia during flower senescence and in response to  
215 hormone treatments. Journal of Experimental Botany, 62(2): 825-840,  
216 Pfaffl MW. (2001) A new mathematical model for relative quantification in real-time RT-PCR.  
217 Nucleic Acids Research, 29, 2002–2007  
218 Shannon P, Markiel A, Ozier O, Baliga NS, Wang JT, Ramage D, Amin N, Schwikowski B,  
219 Ideker T (2003) Cytoscape: a software environment for integrated models of  
220 biomolecular interaction networks. GENOME RES 13:2498-2504  
221 Tan Y, Liu J, Huang F, Guan J, Zhong S, Tang N, Zhao J, Yang W, Yu Y (2014) PhGRL2  
222 protein, interacting with PhACO1, is involved in flower senescence in the petunia.  
223 Molecular Plant, 7:1384-1387  
224 Tatsuki M, Mori H. Phosphorylation of tomato 1-aminocyclopropane-1-carboxylic acid  
225 synthase, LE-ACS2, at the C-terminal region[J]. Journal of Biological Chemistry, 2001,  
226 276(30): 28051-28057.  
227 Wu Q, Cheng Z, Zhu J, et al. Suberoylanilide Hydroxamic Acid Treatment Reveals Crosstalks  
228 among Proteome, Ubiquitylome and Acetylome in Non-Small Cell Lung Cancer A549  
229 Cell Line[J]. Scientific reports, 2015, 5.  
230 Xie X, Kang H, Liu W, Wang G (2015) Comprehensive Profiling of the Rice Ubiquitome  
231 Reveals the Significance of Lysine Ubiquitination in Young Leaves. Journal of Proteome  
232 Research, 2015, 14(5): 2017-2025  
233
