# Supplementary material
Source: PubMed Central journal article supplement (PMC5210702)
Supplement: supp_pp.16.00795_PP2015-01571DR3_Supplemental_Materialfigs1_14.pdf [file supp_pp.16.00795_PP2015-01571DR3_Supplemental_Materialfigs1_14.pdf]

1

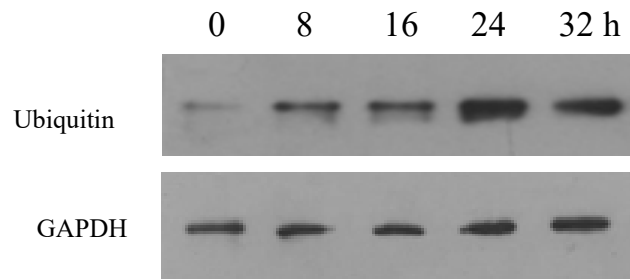

2

3

4 **Figure S1** Effects of ethylene on the expression of ubiquitin in petunia corollas in protein

5 level. The proteins were detected by western blot analysis using an anti-ubiquitin antibody or

6 an anti-GAPDH antibody.

7

8

9

10

11

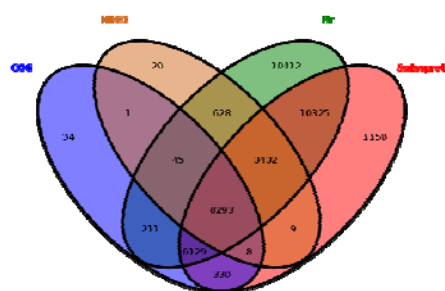

12

13 **Figure S2** Venn diagram of annotation results against four protein databases. The number in  
 14 each color block indicated the number of unigenes that can be annotated by single or multiple  
 15 databases.

16

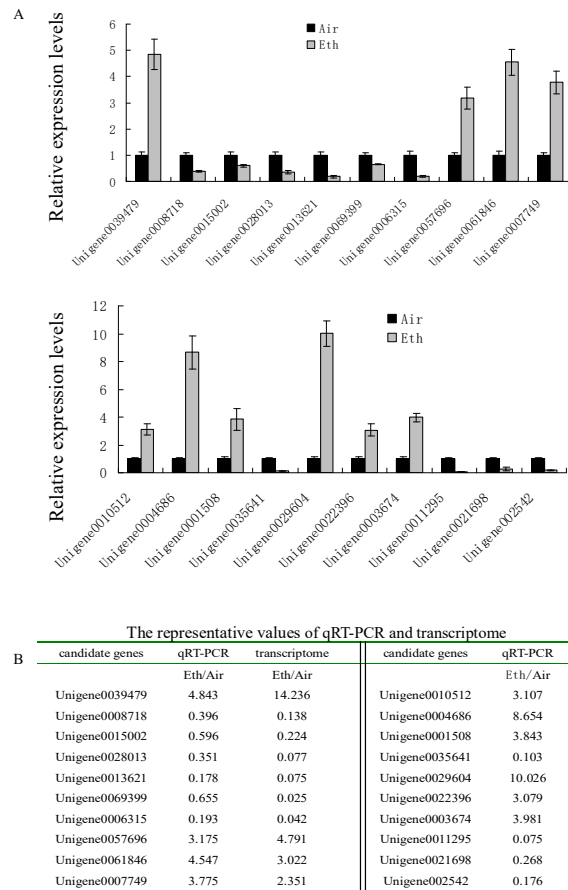

**Figure S3** Confirmation of digital gene expression data by qRT-PCR. A. Expression of 20 random genes used in quantitative real-time PCR in corollas in response to 2 µl l<sup>-1</sup> exogenous ethylene or air treatment 16 h. Relative expression levels are shown as fold change values. Data are presented as the mean ± SD (n = 3). Different letters mean significant difference at P=0.05 level. B, The representative values of qRT-PCR and transcriptome (Eth/Air) of 20 candidate genes.

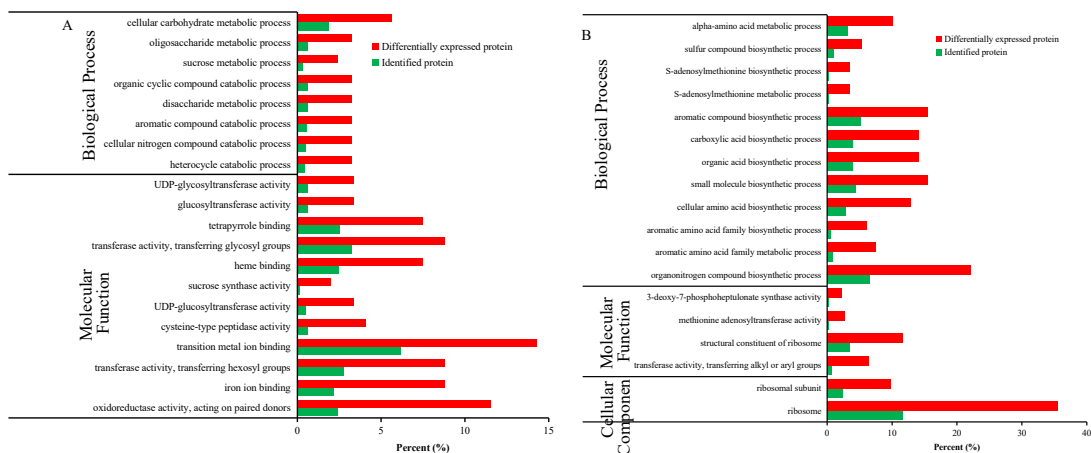

**Figure S4** Functional enrichment analysis of differentially expressed proteins. GO-based enrichment analysis of up-regulated (A) and down-regulated (B) proteins. The percent of differentially expressed proteins indicates the ratio of the mapping proteins to all mapping proteins. The percent of identified proteins indicates the ratio of the background proteins to all background proteins. The significance level was set at  $P < 0.05$  (Fischer's exact test). The data come from the SD Exc4 Sheet1-3.

35  
36

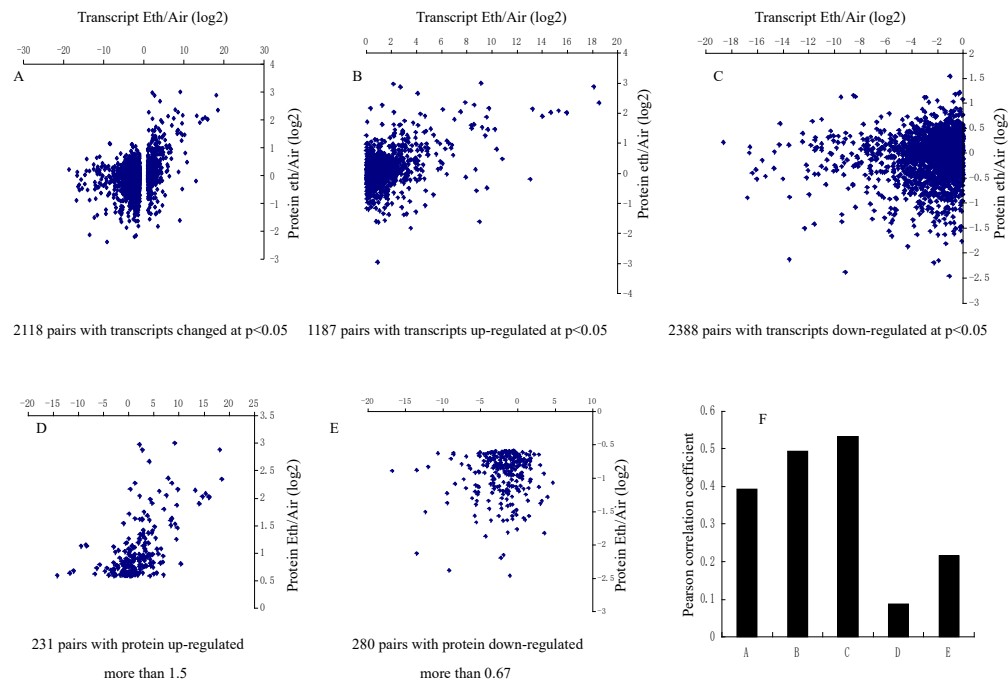

37  
38  
39  
40  
41  
42  
43  
44

**Figure S5** Concordance between changes in the abundance of mRNA and its encoded protein. A–E, Correlation between protein and transcript fold-changes upon ethylene treatment for all transcripts transcript/protein pairs (A), significantly up-regulated transcripts (B), down-regulated transcripts (C), significantly up-regulated proteins (D) and significantly down-regulated proteins (E). F, Pearson correlations of the comparisons shown in A–E.

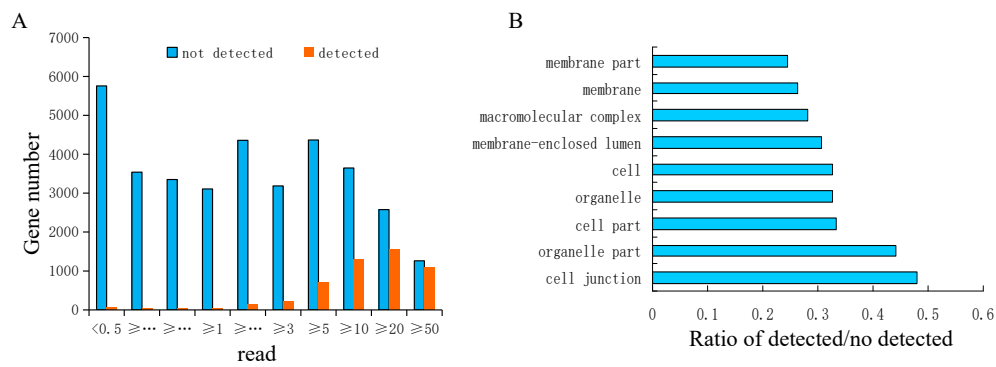

46

47 **Figure S6** Detection of mRNAs and their cognate proteins. A, Dependence of protein  
48 detection on the number of reads of the corresponding transcript. B, Overrepresented gene  
49 ontology categories (cellular component) of detected and nondetected proteins.

50

52  
53  
54  
55  
56

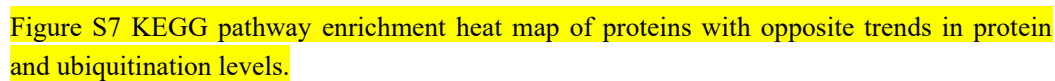

57

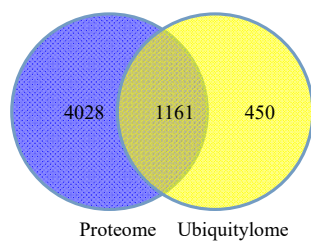

58

59 **Figure S8** Venn diagram of proteomics and ubiquitinomic identification.

60

61

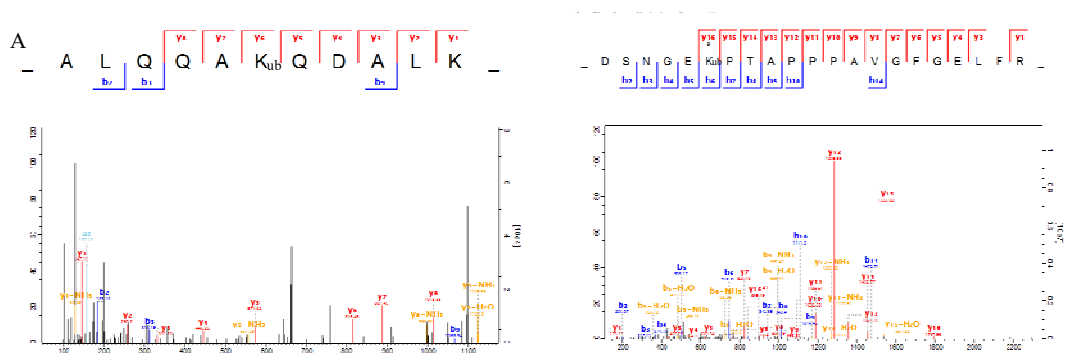

62

63 **Figure S9** MS/MS spectra of ethylene receptor PhETR2 (Unigene0010512) (left) and ABC

64 transporter B (Unigene0017904) (right) ubiquitination.

65



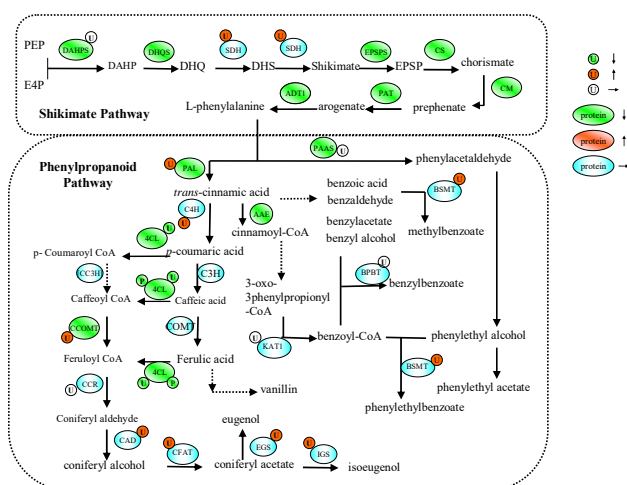

81

82 **Figure S11** Effects of ethylene on floral scent biosynthesis in petunia. Differentially  
 83 expressed proteins based on the statistical significance in this study are framed in oval boxes  
 84 and differentially ubiquitination and phosphorylation of proteins are added round boxes. Red  
 85 box indicates up-regulation, green box indicates up-regulation, and blue box indicates no  
 86 significant change upon ethylene treatment. Abbreviations: AAE, Acyl-activating enzyme;  
 87 ADT1, Arogenate Dehydratase1; BPBT, benzoyl-CoA:benzyl alcohol/2-phenylethanol  
 88 benzoyltransferase; BSMT, S-adenosyl-L-Met: benzoic acid/salicylic acid carboxyl  
 89 methyltransferase; C4H, cinnamate-4-hydroxylase; CAD, cinnamyl alcohol dehydrogenase;  
 90 CCR, cinnamoyl-CoA reductase; CCOMT, caffeoyl-CoA O-methyl transferase; CFAT,  
 91 coniferyl alcohol acetyltransferase; CM, chorismate mutase; CS, chorismate synthase; DAHP,  
 92 3-deoxy-D-arabino-heptulosonic acid 7-phosphate; DAHPS,  
 93 3-deoxy-d-arabino-heptulosonate-7-phosphate synthase; DHQ/SDH, 3-dehydroquinone  
 94 dehydratase/shikimate 5-dehydrogenase; DHQS, 3-dehydroquinone synthase; E4P,  
 95 D-erythrose-4-phosphate; EGS, eugenol synthase; EPSP,  
 96 5-enolpyruvateshikimate-3-phosphate; IGS, isoeugenol synthase; EPSPS,  
 97 5-Enolpyruvylshikimate 3-phosphate synthase; KAT, Ketoacyl CoA thiolase; PAAS,  
 98 phenylacetaldehyde synthase; PAL, Phenylalanine ammonia-lyase; PAT, prephenate  
 99 aminotransferase; PEP, phosphoenolpyruvate; SK, Shikimate kinase.

100



117 [EC:3.1.3.3]. Q, K00548 methH, MTR 5-methyltetrahydrofolate--homocysteine  
118 methyltransferase [EC:2.1.1.13]. R, ko:K00789 metK; S-adenosylmethionine synthetase  
119 [EC:2.5.1.6]. S, ko:K01620 ltaE; threonine aldolase [EC:4.1.2.5]. T, ko:K01586 lysA;  
120 diaminopimelate decarboxylase [EC:4.1.1.20]. U, K01206 LL-diaminopimelate  
121 aminotransferase [EC:2.6.1.83]. V, ko:K00264 GLT1; glutamate synthase (NADPH/NADH)  
122 [EC:1.4.1.13 1.4.1.14]. W, ko:K00611 OTC; ornithine carbamoyltransferase [EC:2.1.3.3].  
123

124

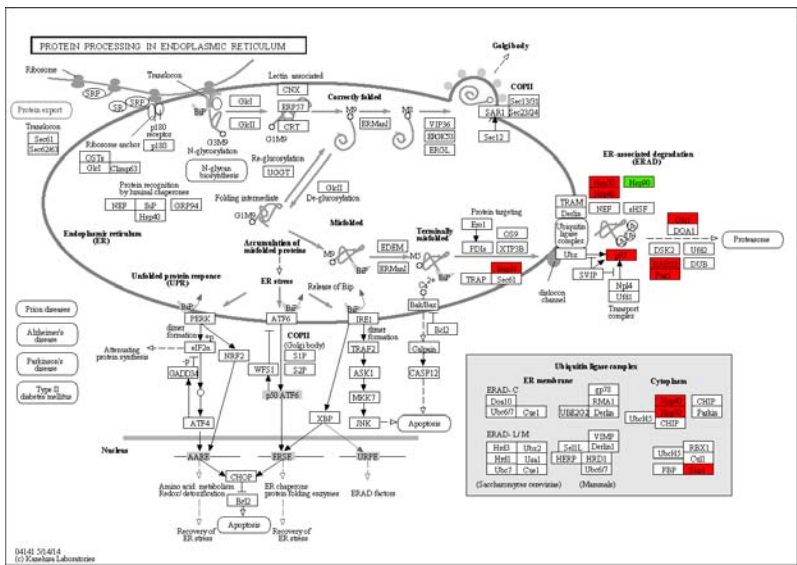

125

126

127 **Figure S13** Effects of ethylene on ERAD (KEGG Pathway: ko04141) in petunia. Red box  
128 indicates up-regulation and green box indicates down-regulation in ubiquitination level upon  
129 ethylene treatment based on the statistical significance in this study.

130

131

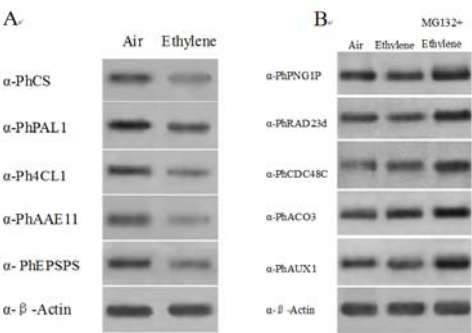

132

133

134

135

136

**Figure S14** Confirmation of proteome and ubiquitylome data. A, Western blot analysis of petunia corollas after treatment with air or 2  $\mu\text{L L}^{-1}$  ethylene for 16 h. B, Western blot analysis of petunia corollas after treatment with 80  $\mu\text{M}$  MG132 for 4 h and 2  $\mu\text{L L}^{-1}$  ethylene for 16 h. The representative results from three independent experiments were indicated.
