# Supplementary material
Source: PubMed Central journal article supplement (PMC5210702)
Supplement: supp_pp.16.00795_PP2015-01571DR3_Supplemental_MaterialTbl1.pdf [file supp_pp.16.00795_PP2015-01571DR3_Supplemental_MaterialTbl1.pdf]

---

**Table S1 Summary of Illumina Paired-end sequencing and assembly**

| Description            | Value      |
|------------------------|------------|
| High quality reads(Mb) | 247.250754 |
| Number of uniques      | 72249      |
| Average length (bp)    | 820.43     |
| Max length (bp)        | 10932      |
| Min length(bp)         | 201        |
| N50 (bp)               | 1379       |

1  
2  
3

---

4

**Table S2 Statistics of RNA-seq results**

| Genes Num | GC percentage | N50  | Max length | Min length | Average length |
|-----------|---------------|------|------------|------------|----------------|
| 72249     | 40.46%        | 1379 | 10932      | 201        | 820.43         |

5

6

7

8

9

10

11  
12

**Table S3 Statistics of annotation of unigene in four databases**

---

| Total<br>Unigenes | Nr    | Swissprot | COG   | Kegg  | annotation<br>unigenes | without<br>annotation<br>unigenes |
|-------------------|-------|-----------|-------|-------|------------------------|-----------------------------------|
| 72249             | 39475 | 29684     | 15051 | 12436 | 41035                  | 31214                             |

---

13  
14

15

**Table S4** Primer sequences of 20 random genes used in quantitative real-time PCR

| Gene           | Forward primer (5'→3') | Reverse primer (5'→3') |
|----------------|------------------------|------------------------|
| Unigene0039479 | GTTGTTACGGAATAAGGC     | ATACACTCCCTCGCTTTA     |
| Unigene0008718 | AGCCGAGGATAAAGGAAG     | TGGTTTGCAGCAAGAAAT     |
| Unigene0015002 | AACAGGAAAGGAACAGGGAA   | AGGGCAGGCTTCAGGTTT     |
| Unigene0028013 | TTACTGGTTGTTGGGACG     | CGGACACCTGGAGACATT     |
| Unigene0013621 | ATAGCATTGTTGGGAGTGA    | TTTGGTAATAAAGGGGTG     |
| Unigene0069399 | CGACAAGAACCCAGAGGA     | GCAGTGGCAGGTGAAGAG     |
| Unigene0006315 | AGGCACGATGAAGAAACAA    | CGACATCCACCTTCCTAA     |
| Unigene0057696 | CATCAACTTCAACCCACCA    | AAGGGAATGAGGATTACGG    |
| Unigene0061846 | GTCTTGCACCTGCTCCATC    | CATCAAATCCAAAGCCTCA    |
| Unigene0007749 | ACGGCTTTGGAAGACGAGG    | CACGGCAAGGATCTGGGAC    |
| Unigene0010512 | TGAGCAGCAACTTCTTGT     | TCTCCAATGGGAATCTAC     |
| Unigene0004686 | CATTCAGGGTTTACTTGG     | TTATGACTACAGGCAGGA     |
| Unigene0001508 | GCTCTTGCTTACGCAGTT     | CACGGGTATCCTATCTTTATTT |
| Unigene0035641 | GCTCCTCTTCCAATCTGT     | GAACCCACTTAATGATAGT    |
| Unigene0029604 | ATCTCCATTGTGAGTCTGCAA  | AGGGCCATAAGCCTTTCAGT   |
| Unigene0022396 | TTCCATCTCCACTTACTATTG  | ATCAAGCCCCAAATTA       |
| Unigene0003674 | AACAACCCTCTTGGAGTC     | TTCGCTCTTTCATCCTTC     |
| Unigene0011295 | CCAATGCCTAGCCCTAACAA   | GGACGCTTCTTCACATCACA   |
| Unigene0021698 | GTAGCACCATAACCCAAAGT   | TGTTAAATGTCGGACCAAG    |
| Unigene0025420 | GTATTCGCAACTCAA        | CTTCTATTAGCCTCCTCT     |
| <i>PhACTIN</i> | TGCTGATCGAATGAGCAAGGAA | GGAGCAACAACCTTAATCTTC  |

16
